# Supplementary material for: Sampling Hyperpolarized Molecules Utilizing a 1 Tesla Permanent Magnetic Field
Source: PubMed Central journal article supplement (PMC5011774; doi:10.1038/srep32846), 2016-09-06
Supplement: srep32846-s1.pdf [file srep32846-s1.pdf]

## Supplementary Information

# Sampling Hyperpolarized Molecules Utilizing a 1 Tesla Permanent Magnetic Field

Sui Seng Tee<sup>‡1</sup>, Valentina DiGialleonardo<sup>‡1</sup>, Roozbeh Eskandari<sup>1</sup>, Sangmoo Jeong<sup>1</sup>, Kristin L. Granlund<sup>1</sup>, Vesselin Miloushev<sup>1</sup>, Alex J. Poot<sup>1</sup>, Steven Truong<sup>2</sup>, Julio A. Alvarez<sup>3</sup>, Hannah N. Aldeborgh<sup>1</sup>, Kayvan R. Keshari<sup>1,3\*</sup>

<sup>1</sup>Department of Radiology and Molecular Pharmacology Program, Memorial Sloan Kettering Cancer Center, New York, NY 10065, USA

<sup>2</sup>Hunter College, New York, NY 10065, USA

<sup>3</sup>Weill Cornell Medical College, NY 10065, USA

## Supplementary Figures

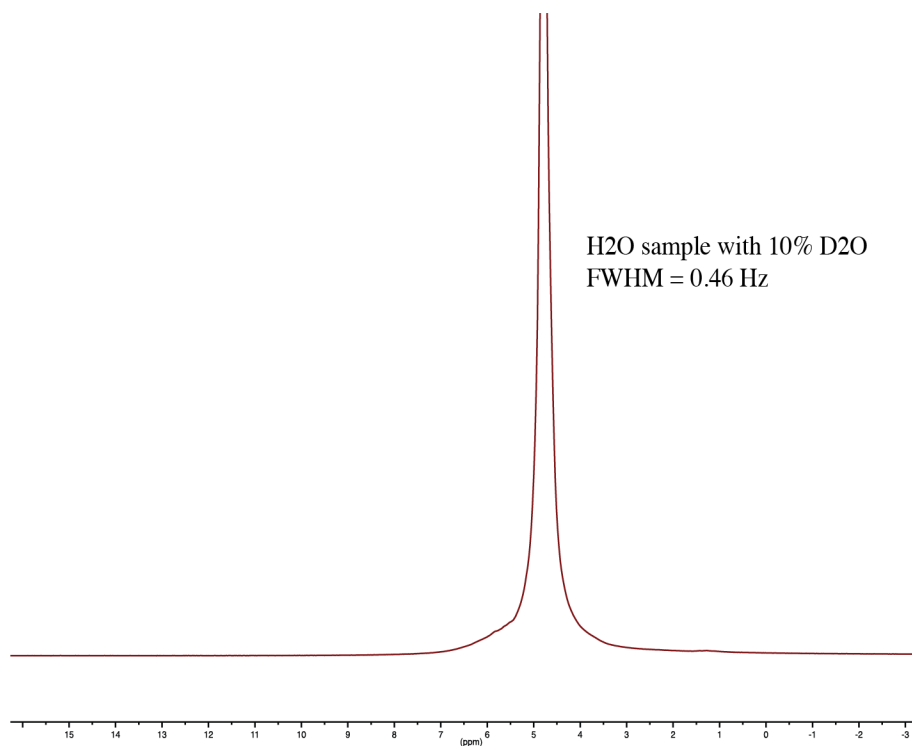

**Supp Fig S1:** Representative spectrum of a 90:10 H<sub>2</sub>O:D<sub>2</sub>O sample. The external magnetic field of the spectrometer with a 1 Tesla permanent magnet consistently produces shim values of < 1.0 Hz.

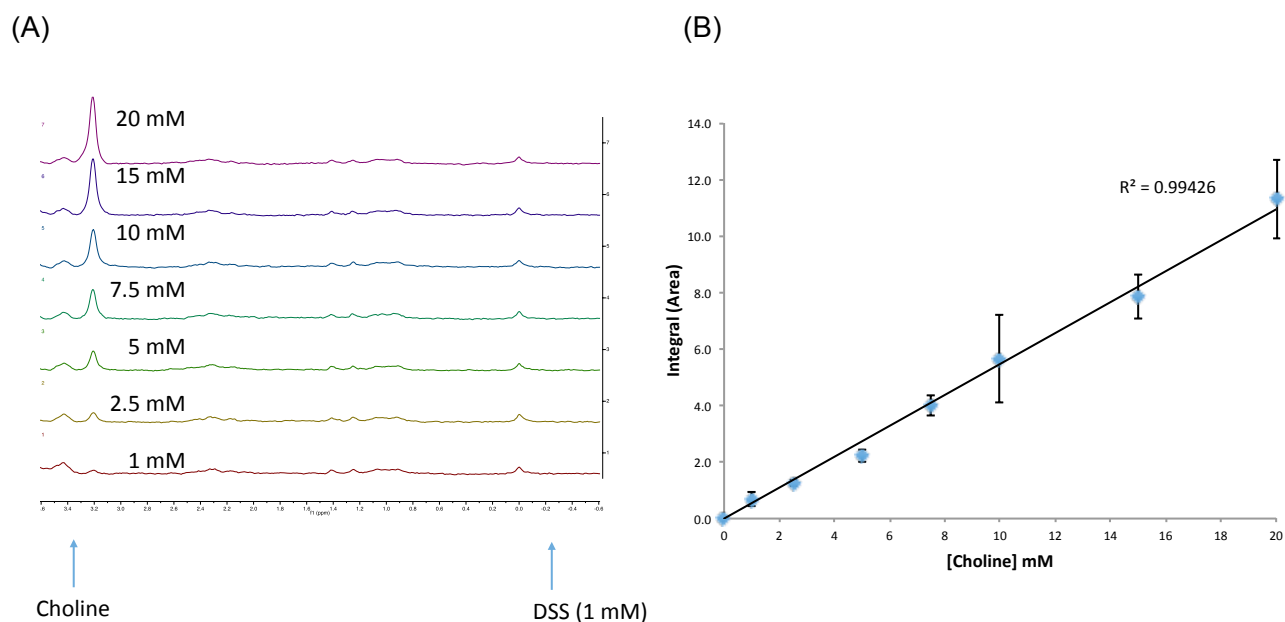

**Supp Fig S2:** (A) Representative spectra of known choline concentrations spiked in DMEM cell culture media with 1mM DSS as a chemical shift indicator. Spectra were acquired using a presaturation pulse (details in *Experimental Section*). (B) Choline peak integrals are linear over various concentrations of choline in complete cell culture media (0.1 to 20 mM).

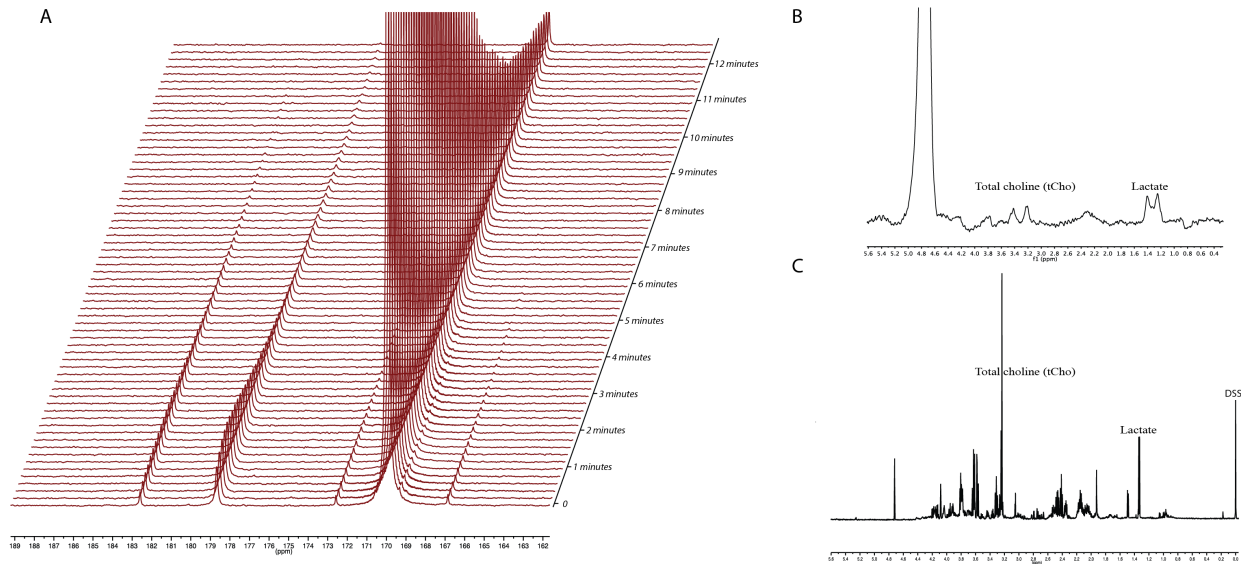

**Supp Fig S3:** (A) In a perfused bioreactor experiment, PC3 cells were encapsulated in alginate and these 3D cultures were able to convert [1-<sup>13</sup>C] pyruvate to lactate (B) Proton spectroscopy of the same alginate beads allows the visualization of intracellular choline (tCho) and lactate after application of a water saturation pulse (C) Confirmation of the high concentrations of tCho in these cells by proton spectroscopy of cells after methanol extraction using a 600 Mhz research magnet.

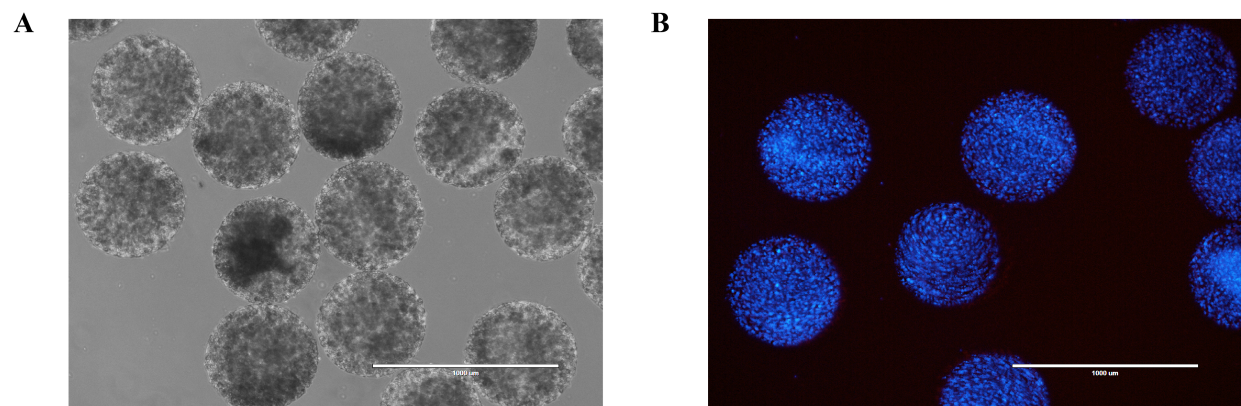

**Supp Fig S4:** (A) Phase-contrast microscopy images of PC3 cells encapsulated in sodium alginate and (B) the same cells stained with DAPI to visualize nuclei. Scale bar represents 1000um

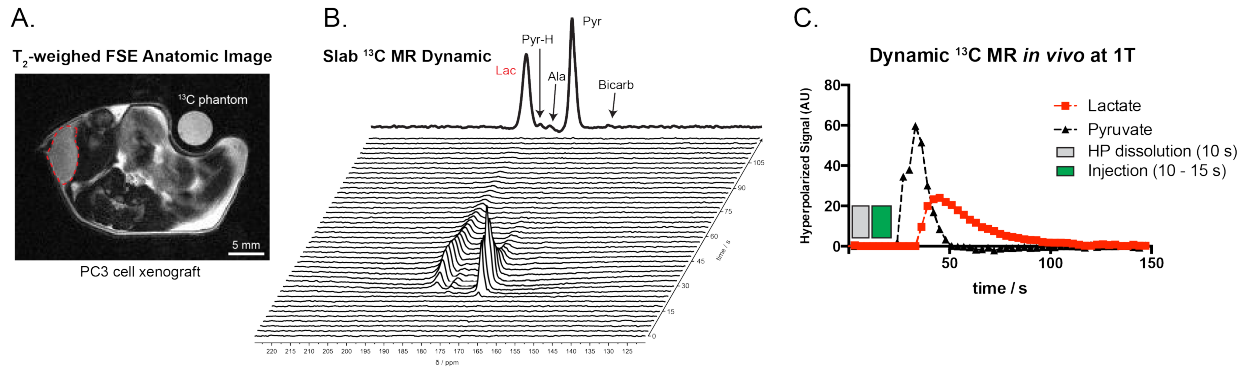

**Figure S5:** (A) T<sub>2</sub>-weighted fast-spin echo (FSE) image of a mouse bearing PC3 prostate cancer cell xenograft that was (B) subsequently injected with 0.05mg/kg hyperpolarized [1-13C] pyruvate. Visible peaks are annotated above and the magnitude of the pyruvate and lactate signals were quantified over time (C)

## GIST T1

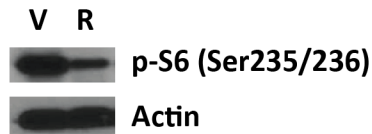

**Supp Fig S6:** Western blot of tumors treated with either DMSO (V) or 100mg/kg rapamycin for 24 hr (R) probed with primary antibody for phospho-S6 at Ser235/236 and actin as a loading control
